# Supplementary material for: The contribution of PIP2-type aquaporins to photosynthetic response to increased vapour pressure deficit
Source: PubMed Central journal article supplement (PMC8219038; doi:10.1093/jxb/erab187), 2021-04-30
Supplement: erab187_suppl_supplementary_file001.pdf [file erab187_suppl_supplementary_file001.pdf]

## Supplementary Material

Table S1: Summary of the main environmental variables under high and low humidity. Plant age refers to the average age at which the plants were measured. Day length was set for the growth room while the greenhouse received the natural photoperiod of sunlight. Due to a non-transparent wall on the west side, the sunset in the greenhouse occurred approximately one hour earlier than the astronomical sunset. All other values are given as daily averages ( $\pm$  SE) and the main differences between the two growing conditions are highlighted in bold.

| <b>Environmental Factor</b>                      | <b>High Humidity</b>                              | <b>Low Humidity</b>                               |
|--------------------------------------------------|---------------------------------------------------|---------------------------------------------------|
| Average plant age at time of measurement (d)     | 30.0                                              | 31.9                                              |
| Day length (h)                                   | 10 (controlled)                                   | 12-13 (astronomical)                              |
| PAR ( $\mu\text{mol m}^{-2} \text{s}^{-1}$ )     | $500 \pm 24$                                      | $690 \pm 37$                                      |
| Vpd during the day/night (kPa)                   | <b><math>1.10 \pm 0.07 / 0.21 \pm 0.07</math></b> | <b><math>2.24 \pm 0.05 / 1.10 \pm 0.05</math></b> |
| Relative humidity during the day/night (%)       | <b><math>51.3 \pm 1.8 / 75 \pm 1.8</math></b>     | <b><math>22.3 \pm 1.3 / 40 \pm 1.3</math></b>     |
| Air temperature day/night ( $^{\circ}\text{C}$ ) | $25.9/20.0 \pm 0.1$                               | $25.1/21.0 \pm 0.1$                               |

Table S2: Gas exchange data and variables calculated from the A-response curves under HH and LH conditions. Means and SE are presented with significant differences compared to the WT indicated where the overall effect of genotype in the ANOVA was significant ( $p < 0.05$ ).  $A_{\text{net}}$  – net photosynthetic rate,  $c_a$  – atmospheric CO<sub>2</sub> concentration,  $c_c$  – CO<sub>2</sub> concentration at the site of carboxylation,  $c_i$  – intercellular CO<sub>2</sub> concentration,  $E$  – whole-plant transpiration,  $g_m$  – mesophyll conductance of CO<sub>2</sub>,  $g_{\text{min}}$  – minimum conductance,  $g_s$  – stomatal conductance, HH – high humidity,  $\theta$  – degree of curvature of a light response curve,  $J_{\text{max}}$  – maximum rate of electron transport, LCP – light compensation point, LH – low humidity, Q75% $A_{\text{sat}}$  – irradiance at which 75% of the saturating rate of photosynthesis is reached,  $R_d$  – respiration in the light, RWC – relative water content,  $V_{\text{cmax}}$  – maximum rate of carboxylation, Vpd – vapour pressure deficit,  $\phi$  – quantum efficiency, WT – wild type

| Variable                                                        | WT             | 2;2                                     | 2;4                                     | 2;5            | 2;2x2;4                                 | 2;4x2;5                                  | 2;2x2;4x2;5                             |
|-----------------------------------------------------------------|----------------|-----------------------------------------|-----------------------------------------|----------------|-----------------------------------------|------------------------------------------|-----------------------------------------|
| $A_{\text{net}}$ LH<br>( $\mu\text{mol m}^{-2} \text{s}^{-1}$ ) | 10.72 ± 0.78   | 12.17 ± 1.14                            | <b>13.86 ± 1.14</b><br>( $p = 0.010$ )  | 10.10 ± 1.29   | 12.36 ± 1.14                            | <b>13.06 ± 1.10</b><br>( $p = 0.041$ )   | 11.56 ± 1.14                            |
| $A_{\text{net}}$ HH<br>( $\mu\text{mol m}^{-2} \text{s}^{-1}$ ) | 16.26 ± 1.00   | 17.18 ± 1.34                            | 15.51 ± 1.34                            | 15.10 ± 1.41   | 17.17 ± 1.25                            | 17.61 ± 1.22                             | 17.37 ± 1.29                            |
| $g_s$ LH<br>( $\text{mol m}^{-2} \text{s}^{-1}$ )               | 0.124 ± 0.017  | 0.156 ± 0.026                           | <b>0.179 ± 0.026</b><br>( $p = 0.037$ ) | 0.127 ± 0.029  | <b>0.176 ± 0.026</b><br>( $p = 0.049$ ) | <b>0.193 ± 0.025</b><br>( $p = 0.008$ )  | 0.156 ± 0.026                           |
| $g_s$ HH<br>( $\text{mol m}^{-2} \text{s}^{-1}$ )               | 0.290 ± 0.034  | <b>0.370 ± 0.046</b><br>( $p = 0.089$ ) | 0.303 ± 0.046                           | 0.329 ± 0.048  | <b>0.375 ± 0.043</b><br>( $p = 0.055$ ) | 0.357 ± 0.042                            | <b>0.366 ± 0.044</b><br>( $p = 0.091$ ) |
| $g_m$ LH ( $\text{mol m}^{-2} \text{s}^{-1} \text{bar}^{-1}$ )  | 0.135 ± 0.036  | 0.145 ± 0.036                           | 0.170 ± 0.043                           | 0.091 ± 0.028  | 0.179 ± 0.040                           | 0.146 ± 0.043                            | 0.159 ± 0.036                           |
| $g_m$ HH ( $\text{mol m}^{-2} \text{s}^{-1} \text{bar}^{-1}$ )  | 0.118 ± 0.012  | 0.126 ± 0.012                           | 0.111 ± 0.012                           | 0.107 ± 0.009  | 0.110 ± 0.011                           | 0.127 ± 0.011                            | 0.131 ± 0.012                           |
| IWUE LH<br>( $\mu\text{mol mol}^{-1}$ )                         | 89.415 ± 5.693 | 80.644 ± 8.379                          | 77.316 ± 8.379                          | 83.346 ± 9.440 | 77.317 ± 8.379                          | <b>70.540 ± 8.051</b><br>( $p = 0.025$ ) | 75.459 ± 8.379                          |
| IWUE HH<br>( $\mu\text{mol mol}^{-1}$ )                         | 57.671 ± 4.405 | 46.860 ± 5.910                          | 51.577 ± 5.910                          | 45.994 ± 6.230 | 47.148 ± 5.522                          | 51.092 ± 5.395                           | 49.164 ± 5.687                          |
| $g_{\text{min}}$<br>( $\text{mmol m}^{-2} \text{s}^{-1}$ )      | 5.55 ± 0.28    | 5.90 ± 0.41                             | 5.37 ± 0.42                             | 5.75 ± 0.41    | 5.45 ± 0.40                             | 5.93 ± 0.40                              | 6.29 ± 0.40                             |
| Vpd in cuvette<br>LH (kPa)                                      | 2.296 ± 0.143  | 2.430 ± 0.210                           | 2.157 ± 0.210                           | 2.586 ± 0.236  | 2.009 ± 0.210                           | 2.034 ± 0.202                            | 2.331 ± 0.210                           |
| Vpd in cuvette<br>HH (kPa)                                      | 1.201 ± 0.082  | 1.050 ± 0.109                           | 1.165 ± 0.109                           | 1.092 ± 0.115  | 1.039 ± 0.102                           | 1.127 ± 0.100                            | 1.071 ± 0.105                           |
| $V_{\text{cmax}}$                                               | 58.75 ± 3.42   | 56.48 ± 4.33                            | 56.44 ± 4.33                            | 58.04 ± 5.07   | 52.14 ± 5.41                            | 54.48 ± 5.41                             | 57.05 ± 5.07                            |

|                                                                                                 |                |                                        |                                        |                                         |                                        |                                        |                                       |
|-------------------------------------------------------------------------------------------------|----------------|----------------------------------------|----------------------------------------|-----------------------------------------|----------------------------------------|----------------------------------------|---------------------------------------|
| <b>(<math>\mu\text{mol m}^{-2} \text{s}^{-1}</math>)</b>                                        |                |                                        |                                        |                                         |                                        |                                        |                                       |
| <b><math>J_{\text{max}}</math><br/>(<math>\mu\text{Eq m}^{-2} \text{s}^{-1}</math>)</b>         | 132.25 ± 6.91  | 122.90 ± 8.74                          | 122.47 ± 8.74                          | 128.76 ± 10.25                          | 112.89 ± 10.93                         | 122.44 ± 10.93                         | 128.19 ± 10.25                        |
| <b><math>c_c</math> inflection<br/>(<math>\mu\text{mol}</math>)</b>                             | 529.89 ± 30.61 | 496.52 ± 38.72                         | 489.46 ± 38.72                         | 506.34 ± 45.40                          | 490.18 ± 48.40                         | 537.99 ± 48.40                         | 537.26 ± 45.40                        |
| <b><math>c_i/c_a</math> *<br/>(<math>\mu\text{mol } \mu\text{mol}^{-1}</math>)</b>              | 0.82 ± 0.03    | 0.80 ± 0.03                            | 0.80 ± 0.03                            | 0.81 ± 0.04                             | 0.80 ± 0.04                            | 0.81 ± 0.04                            | 0.82 ± 0.04                           |
| <b><math>c_i/c_a</math> **<br/>(<math>\mu\text{mol } \mu\text{mol}^{-1}</math>)</b>             | 0.79 ± 0.01    | 0.78 ± 0.01                            | 0.78 ± 0.01                            | <b>0.75 ± 0.01</b><br>( $p = 0.008$ )   | 0.77 ± 0.01                            | <b>0.75 ± 0.01</b><br>( $p = 0.013$ )  | <b>0.74 ± 0.01</b><br>( $p < 0.001$ ) |
| <b>RWC HH (%)</b>                                                                               | 93.29 ± 0.54   | 93.67 ± 0.79                           | 93.95 ± 0.80                           | 93.12 ± 0.79                            | 93.83 ± 0.77                           | 93.20 ± 0.78                           | 94.10 ± 0.77                          |
| <b>Leaf mass area<br/>(<math>\text{mg cm}^{-2}</math>)</b>                                      | 3.279 ± 0.122  | 3.003 ± 0.178                          | 3.283 ± 0.181                          | 3.080 ± 0.178                           | 3.130 ± 0.173                          | 3.125 ± 0.175                          | 3.054 ± 0.173                         |
| <b><math>A_{\text{sat LH}}</math><br/>(<math>\mu\text{mol m}^{-2} \text{s}^{-1}</math>)</b>     | 21.68 ± 1.09   | 23.22 ± 1.60                           | <b>24.82 ± 1.60</b><br>( $p = 0.058$ ) | 20.05 ± 1.80                            | 22.80 ± 1.60                           | 23.10 ± 1.54                           | 21.95 ± 1.60                          |
| <b><math>A_{\text{sat HH}}</math><br/>(<math>\mu\text{mol m}^{-2} \text{s}^{-1}</math>)</b>     | 24.17 ± 0.70   | <b>21.07 ± 0.99</b><br>( $p = 0.003$ ) | 22.36 ± 0.99                           | 22.45 ± 1.01                            | <b>20.92 ± 0.99</b><br>( $p = 0.002$ ) | <b>22.08 ± 0.99</b><br>( $p = 0.038$ ) | 23.21 ± 0.96                          |
| <b><math>\phi</math> LH<br/>(<math>\text{mol mol}^{-1}</math>)</b>                              | 0.080 ± 0.004  | 0.078 ± 0.005                          | 0.086 ± 0.005                          | <b>0.067 ± 0.006</b><br>( $p = 0.026$ ) | 0.076 ± 0.005                          | 0.089 ± 0.005                          | 0.079 ± 0.005                         |
| <b><math>\phi</math> HH<br/>(<math>\text{mol mol}^{-1}</math>)</b>                              | 0.052 ± 0.002  | 0.052 ± 0.003                          | 0.052 ± 0.003                          | 0.052 ± 0.003                           | 0.051 ± 0.003                          | 0.053 ± 0.003                          | 0.052 ± 0.003                         |
| <b><math>R_d</math> LH<br/>(<math>\mu\text{mol m}^{-2} \text{s}^{-1}</math>)</b>                | 1.47 ± 0.13    | 1.83 ± 0.19                            | 1.79 ± 0.19                            | 1.81 ± 0.21                             | 1.41 ± 0.19                            | 1.52 ± 0.18                            | 1.45 ± 0.18                           |
| <b><math>R_d</math> HH<br/>(<math>\mu\text{mol m}^{-2} \text{s}^{-1}</math>)</b>                | 2.40 ± 0.09    | <b>2.06 ± 0.13</b><br>( $p = 0.014$ )  | 2.23 ± 0.17                            | 2.27 ± 0.14                             | <b>2.07 ± 0.13</b><br>( $p = 0.015$ )  | 2.25 ± 0.13                            | 2.32 ± 0.13                           |
| <b><math>\theta</math> LH</b>                                                                   | 0.564 ± 0.063  | 0.568 ± 0.092                          | 0.579 ± 0.092                          | 0.551 ± 0.104                           | 0.566 ± 0.092                          | 0.515 ± 0.092                          | 0.660 ± 0.092                         |
| <b><math>\theta</math> HH</b>                                                                   | 0.767 ± 0.019  | 0.785 ± 0.026                          | 0.771 ± 0.026                          | 0.759 ± 0.027                           | 0.749 ± 0.026                          | 0.737 ± 0.026                          | 0.780 ± 0.026                         |
| <b>LCP LH<br/>(<math>\mu\text{mol m}^{-2} \text{s}^{-1}</math>)</b>                             | 18.90 ± 1.62   | <b>24.43 ± 2.39</b><br>( $p = 0.027$ ) | 21.67 ± 2.39                           | <b>28.86 ± 2.69</b><br>( $p < 0.001$ )  | 19.26 ± 2.39                           | 17.77 ± 2.30                           | 18.89 ± 2.39                          |
| <b>LCP HH<br/>(<math>\mu\text{mol m}^{-2} \text{s}^{-1}</math>)</b>                             | 47.88 ± 2.53   | 42.58 ± 3.58                           | 44.39 ± 3.58                           | 45.39 ± 3.68                            | 42.57 ± 3.58                           | 44.39 ± 3.58                           | 46.83 ± 3.50                          |
| <b>Q75%<math>A_{\text{sat LH}}</math><br/>(<math>\mu\text{mol m}^{-2} \text{s}^{-1}</math>)</b> | 652.57 ± 62.98 | 743.50 ± 92.70                         | 703.37 ± 92.70                         | 844.03 ± 104.44                         | 709.22 ± 92.70                         | 729.67 ± 89.06                         | 565.59 ± 92.70                        |
| <b>Q75%<math>A_{\text{sat LH}}</math><br/>(<math>\mu\text{mol m}^{-2} \text{s}^{-1}</math>)</b> | 929.81 ± 53.72 | 784.26 ± 75.97                         | 848.39 ± 75.97                         | 883.68 ± 78.05                          | 854.54 ± 75.97                         | 915.76 ± 75.97                         | 877.50 ± 74.23                        |

|                                                         |             |                                           |                                           |                                          |                                          |             |             |
|---------------------------------------------------------|-------------|-------------------------------------------|-------------------------------------------|------------------------------------------|------------------------------------------|-------------|-------------|
| <b>E LH</b><br>(ml cm <sup>-2</sup> )                   | 1.15 ± 0.07 | <b>1.41 ± 0.09</b><br>( <i>p</i> = 0.005) | <b>1.38 ± 0.09</b><br>( <i>p</i> = 0.014) | 1.11 ± 0.09                              | 1.26 ± 0.09                              | 1.14 ± 0.10 | 1.29 ± 0.10 |
| <b>E HH</b><br>(ml cm <sup>-2</sup> )                   | 0.37 ± 0.04 | 0.38 ± 0.06                               | 0.38 ± 0.06                               | 0.37 ± 0.06                              | 0.36 ± 0.06                              | 0.37 ± 0.06 | 0.37 ± 0.06 |
| <b>Final leaf area</b><br><b>LH</b> (cm <sup>-2</sup> ) | 12.6 ± 1.7  | 13.5 ± 2.3                                | 16.1 ± 2.4                                | 15.2 ± 2.3                               | 14.1 ± 2.3                               | 14.5 ± 2.4  | 11.4 ± 2.4  |
| <b>Final leaf area</b><br><b>HH</b> (cm <sup>-2</sup> ) | 37.4 ± 1.1  | <b>33.4 ± 1.5</b><br>( <i>p</i> = 0.011)  | <b>31.1 ± 1.6</b><br>( <i>p</i> < 0.001)  | <b>34.0 ± 1.5</b><br>( <i>p</i> = 0.031) | <b>33.8 ± 1.5</b><br>( <i>p</i> = 0.021) | 35.9 ± 1.5  | 36.1 ± 1.5  |

$c_i/c_a$  \*\*low CO<sub>2</sub> end of A - c<sub>i</sub> curve;  $c_i/c_a$  \*\*\* high CO<sub>2</sub> end of A - c<sub>i</sub> curve.

Table S3: Two-Way-ANOVA tables for whole-plant transpiration and leaf area

| <b>Whole-plant transpiration in terms of cumulative leaf area</b> |                |            |                 |                   |
|-------------------------------------------------------------------|----------------|------------|-----------------|-------------------|
|                                                                   | Sum of Squares | Df         | F-value         | <i>p</i> -value   |
| Line                                                              | 0.611          | 6          | 3.588           | <b>0.002</b>      |
| Treatment                                                         | 37.139         | 1          | 11308.689       | <b>&lt; 0.001</b> |
| Line:Treatment                                                    | 0.614          | 6          | 3.606           | <b>0.002</b>      |
| Residuals                                                         | 5.080          | 179        |                 |                   |
|                                                                   | Estimate       | Std. Error | <i>t</i> -value | <i>p</i> -value   |
| WT (Intercept)                                                    | 0.370          | 0.043      | 8.508           | <b>&lt; 0.001</b> |
| <i>pip2</i> ;2                                                    | 0.379          | 0.061      | 0.141           | 0.888             |
| <i>pip2</i> ;4                                                    | 0.379          | 0.063      | 0.144           | 0.885             |
| <i>pip2</i> ;5                                                    | 0.371          | 0.062      | 0.012           | 0.991             |
| <i>pip2</i> ;2x2;4                                                | 0.356          | 0.062      | -0.230          | 0.818             |
| <i>pip2</i> ;4x2;5                                                | 0.365          | 0.062      | -0.075          | 0.940             |
| <i>pip2</i> ;2x2;4x2;5                                            | 0.371          | 0.062      | 0.018           | 0.986             |
| WT (Treatment LH)                                                 | 1.150          | 0.069      | 11.339          | <b>&lt; 0.001</b> |
| <i>pip2</i> ;2:Treatment LH                                       | 1.414          | 0.092      | 2.858           | <b>0.005</b>      |
| <i>pip2</i> ;4:Treatment LH                                       | 1.385          | 0.095      | 2.484           | <b>0.014</b>      |
| <i>pip2</i> ;5:Treatment LH                                       | 1.111          | 0.093      | -0.424          | 0.672             |
| <i>pip2</i> ;2x2;4:Treatment LH                                   | 1.264          | 0.092      | 1.239           | 0.217             |
| <i>pip2</i> ;4x2;5:Treatment LH                                   | 1.137          | 0.096      | -0.131          | 0.896             |
| <i>pip2</i> ;2x2;4x2;5:Treatment LH                               | 1.286          | 0.096      | 1.419           | 0.158             |
| <b>Total leaf area at 30 days</b>                                 |                |            |                 |                   |
|                                                                   | Sum of Squares | Df         | F-value         | <i>p</i> -value   |
| Line                                                              | 424.6          | 6          | 3.948           | <b>&lt; 0.001</b> |
| Treatment                                                         | 26068.2        | 1          | 11454.259       | <b>&lt; 0.001</b> |
| Line:Treatment                                                    | 98.3           | 6          | 0.914           | 0.486             |
| Residuals                                                         | 3208.7         | 179        |                 |                   |
|                                                                   | Estimate       | Std. Error | <i>t</i> -value | <i>p</i> -value   |
| WT (Intercept)                                                    | 37.355         | 1.093      | 34.171          | <b>&lt; 0.001</b> |
| <i>pip2</i> ;2                                                    | 33.423         | 1.522      | -2.584          | <b>0.011</b>      |
| <i>pip2</i> ;4                                                    | 31.060         | 1.573      | -4.001          | <b>&lt; 0.001</b> |
| <i>pip2</i> ;5                                                    | 33.989         | 1.546      | -2.177          | <b>0.031</b>      |
| <i>pip2</i> ;2x2;4                                                | 33.753         | 1.546      | -2.330          | <b>0.021</b>      |
| <i>pip2</i> ;4x2;5                                                | 35.866         | 1.546      | -0.963          | 0.337             |
| <i>pip2</i> ;2x2;4x2;5                                            | 36.052         | 1.546      | -0.843          | 0.400             |
| WT (Treatment LH)                                                 | 12.615         | 1.729      | -14.313         | <b>&lt; 0.001</b> |
| <i>pip2</i> ;2:Treatment LH                                       | 13.454         | 2.321      | 0.362           | 0.718             |
| <i>pip2</i> ;4:Treatment LH                                       | 16.114         | 2.376      | 1.473           | 0.143             |
| <i>pip2</i> ;5:Treatment LH                                       | 15.224         | 2.337      | 1.116           | 0.266             |
| <i>pip2</i> ;2x2;4:Treatment LH                                   | 14.119         | 2.319      | 0.649           | 0.517             |
| <i>pip2</i> ;4x2;5:Treatment LH                                   | 14.469         | 2.411      | 0.769           | 0.443             |
| <i>pip2</i> ;2x2;4x2;5:Treatment LH                               | 11.422         | 2.411      | -0.495          | 0.622             |

Table S4: Primers used in this study

| <b>Yeast Transformation</b> |                                                                        |
|-----------------------------|------------------------------------------------------------------------|
| <b>Gene</b>                 | <b>Primer</b>                                                          |
| AtβCA1                      | For: 5'-<br>GGGGACAAGTTTGTACAAAAAAGCAGGCTTCATGGGAACCGA<br>AGCATAC-3'   |
| AtβCA1                      | Rev: 5'-<br>GGGGACCACTTTGTACAAGAAAGCTGGGTCTACAGAGCTAGTT<br>TCGGA-3'    |
| GTAAtPIP2-5                 | For: 5'-<br>GGGGACAAGTTTGTACAAAAAAGCAGGCTTCATGACGAAGGA<br>AGTGGTTGG-3' |
| GT AtPIP2-5                 | Rev: 5' -<br>GGGGACCACTTTGTACAAGAAAGCTGGGTCTTAAACGTGAGGC<br>TGGCTCC-3' |
| AtPIP2-5qPCR                | For: 5'- TCGCATGGGCCTTTGG-3'                                           |
| AtPIP2-5qPCR                | Rev: 5'- GCCGGCGGTGCAGTAG-3'                                           |
| AtβCA1qPCR                  | For: 5'- CAATGTGGCCGATGTGAAAG-3'                                       |
| AtβCA1qPCR                  | Rev: 5'- CAGAGCTAGTTTCGGAGAG-3'                                        |
| ScACT1                      | For: 5'- AGAGTTGCCCCAGAAGAACA-3'                                       |
| ScACT1                      | Rev: 5'- GGCTTGGATGGAAACGTAGA-3'                                       |
| <b>Gene Expression</b>      |                                                                        |
| <b>PIP Gene</b>             | <b>Primer</b>                                                          |
| PIP1;1 (At3g61430)          | For: 5'- TCTTAACCCAAAGGCCAACA-3'                                       |
| PIP1;1 (At3g61430)          | Rev: 5'- CAGAATCCAGCACAAATACCG-3'                                      |
| PIP1;2 (At2g45960)          | For: 5'- TGGGATGACCACTGGGTGTTT-3'                                      |
| PIP1;2 (At2g45960)          | Rev: 5'- GGGATGGCTCTGATGACAACC-3'                                      |
| PIP1;3 (At1g01620)          | For: 5'- CTTCCGTCGGAATCCAAGGT-3'                                       |
| PIP1;3 (At1g01620)          | Rev: 5'- CGTGTGAGCGAAAGCTTCCT-3'                                       |
| PIP1;4 (At4g00430)          | For: 5'- GGAATCTCTGGTGGGCACAT-3'                                       |
| PIP1;4 (At4g00430)          | Rev: 5'- CTCCGAGACATTGCATCACG-3'                                       |
| PIP1;5 (At4g23400)          | For: 5'- TGGGATGACCATTGGATTTT-3'                                       |
| PIP1;5 (At4g23400)          | Rev: 5'- TCTGGACCGTGGAATCTTTC-3'                                       |
| PIP2;1 (At3g53420)          | For: 5'- GCTGGAATCTCAGGAGGACATATT-3'                                   |
| PIP2;1 (At3g53420)          | Rev: 5'- AGCTCCAAGGCACTGCATTACT-3'                                     |
| PIP2;2 (At2g37170)          | For: 5'- TAGATTGCGGCGGAGTTGGA-3'                                       |
| PIP2;2 (At2g37170)          | Rev: 5'- CGCTGGGTTAATGTGACCACCA-3'                                     |
| PIP2;3 (At2g37180)          | For: 5'- CAAAGACGTGGAAGGACCTGAG-3'                                     |

|                       |                                        |
|-----------------------|----------------------------------------|
| PIP2;3 (At2g37180)    | Rev: 5′ - ACTTGGTAAGCTCGTCCGCA-3′      |
| PIP2;4 (At5g60660)    | For: 5′ - TTCGACGCAGAGGAGCTTAC-3′      |
| PIP2;4 (At5g60660)    | Rev: 5′ - GCTACGAACTCGGCGATGACT-3′     |
| PIP2;5 (At3g54820)    | For: 5′ - CCGATGGCTACAACAAAGGT-3′      |
| PIP2;5 (At3g54820)    | Rev: 5′ - CACGTGAGAGTCACGAGCAT-3′      |
| PIP2;6 (At2g39010)    | For: 5′ - TGGTGGGCATATTAATCCGGCAGT-3′  |
| PIP2;6 (At2g39010)    | Rev: 5′ - TGACCAAAGCCACACCACAAATGG-3′  |
| PIP2;7 (At4g35100)    | For: 5′ - GGCATCTCTGGTGGACACATC-3′     |
| PIP2;7 (At4g35100)    | Rev: 5′ - CAACTCCACAAGTGGCTCCG-3′      |
| PIP2;8 (At2g16850)    | For: 5′ - CGTGGGATGACCAATGGATC-3′      |
| PIP2;8 (At2g16850)    | Rev: 5′ - TGC GTTGCTTCGGAACGAG-3′      |
| <b>Reference Gene</b> |                                        |
| YLS8 (At5g08290)      | For: 5′ - TTACTGTTTCGGTTGTTCTCCATTT-3′ |
| YLS8 (At5g08290)      | Rev: 5′ - CACTGAATCATGTTCGAAGCAAGT-3′  |
| MON1 (At2g28390)      | For: 5′ - CAGACAAGGCGATGGCGATA-3′      |
| MON1 (At2g28390)      | Rev: 5′ - GCTTTCTCTCAAGGGTTTCTGGGT-3′  |
| TIP41 (At4g34270)     | For: 5′ - GTGAAAAGTGTGGAGAGAAGCAA-3′   |
| TIP41 (At4g34270)     | Rev: 5′ - TCAACTGGATACCCTTTCGCA-3′     |

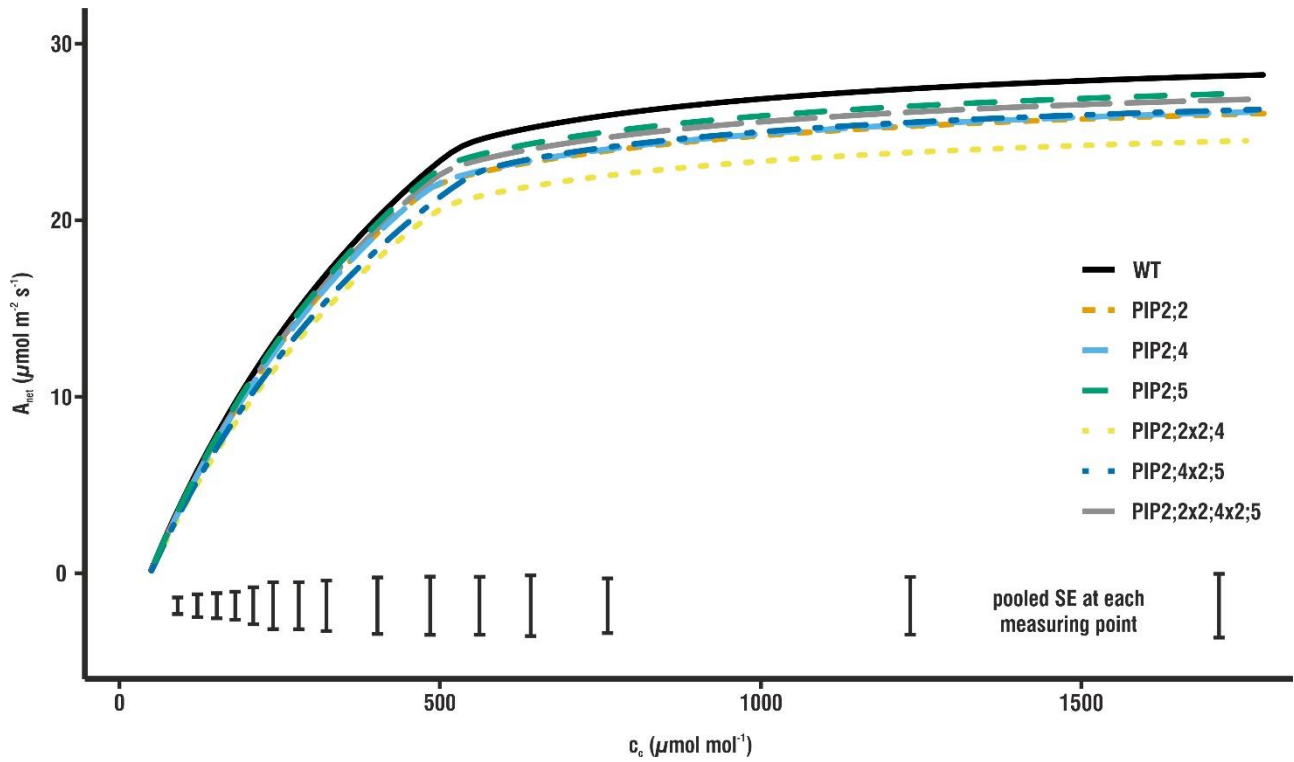

Figure S1: Fitted  $A-c_c$  curves for all mutant lines and the WT measured at  $\text{PAR} = 1500 \mu\text{mol m}^{-2} \text{s}^{-1}$ . At ambient  $\text{CO}_2$  ( $\approx 400 \mu\text{mol mol}^{-1}$  air),  $A_{net}$  is  $\text{CO}_2$ -limited, because this  $\text{CO}_2$  concentration is situated in the linear part of the curve. Fitted means with the pooled SE are shown at the bottom of the graph ( $n = 8-10$ ).



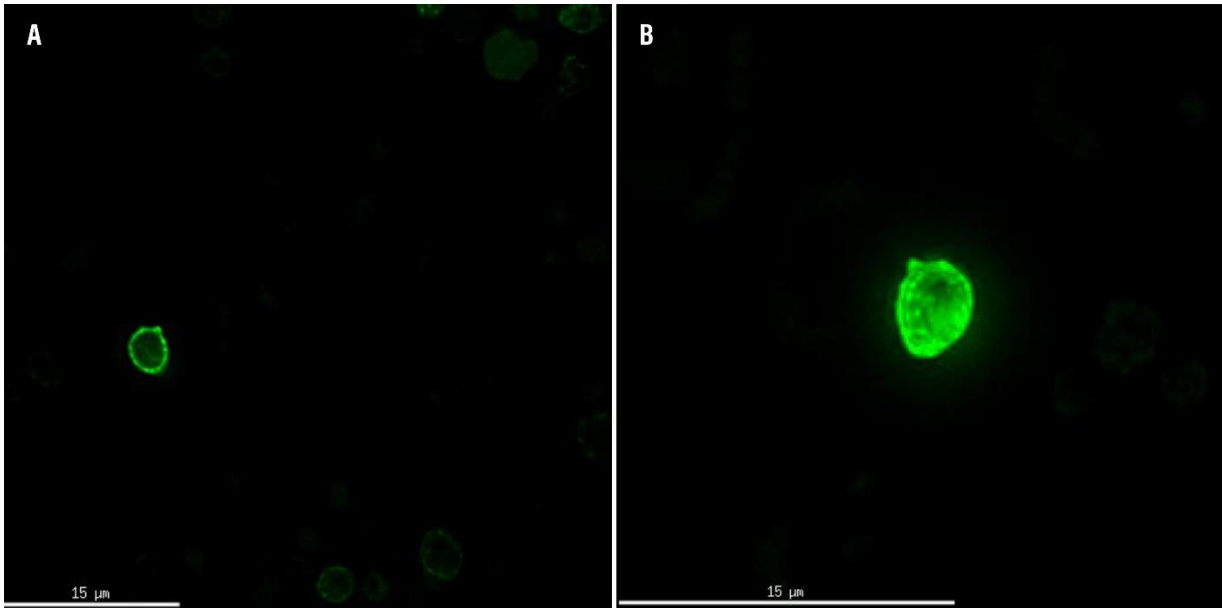

Figure S2: Representative fluorescence microscopy images (**A** – 2D; **B** – 3D) of transformed *S. cerevisiae* cells expressing *AtPIP2;5* with a C-terminal eGFP tag. The protein clearly localises to the plasma membrane.

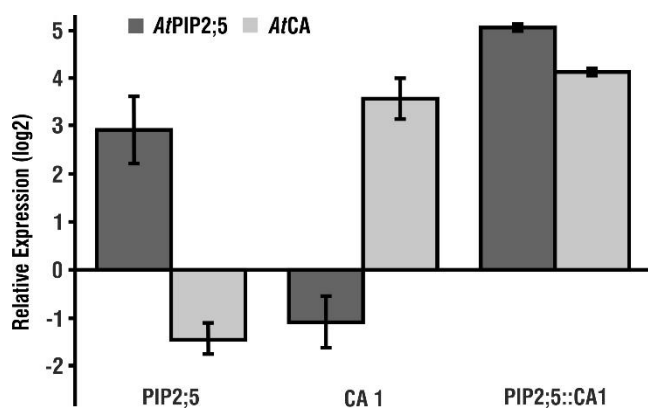

Figure S3: Relative expression of *AtPIP2;5* and *AtCA1* in transformed *S. cerevisiae* cells expressing *AtPIP2;5*, *AtCA1* or both. The yeast strains are indicated at the bottom of the graph. Values are means  $\pm$  SD.
